# Supplementary material for: Synthesis and Antibacterial Properties of Novel ZnMn2O4–Chitosan Nanocomposites
Source: MDPI journal article supplement (doi:10.3390/nano9111589), 2019-11-09
Supplement: s1 [file s1]

Supporting information

# Synthesis and antibacterial properties of novel ZnMn<sub>2</sub>O<sub>4</sub>–chitosan nanocomposites

Rajiv Gandhi Packirisamy<sup>1</sup>, Chandramohan Govindasamy<sup>1</sup>, Anandhavelu Sanmugam<sup>2</sup>, K. Karuppasamy<sup>3</sup>, Hyun-Seok Kim<sup>3</sup>, Dhanasekaran Vikraman<sup>3\*</sup>

<sup>1</sup>Research and Development Centre, Bharathiar University, Coimbatore 641046, India.

<sup>2</sup>Department of Chemistry, Vel Tech Multi Tech., Chennai 600062, India.

<sup>3</sup>Division of Electronics and Electrical Engineering, Dongguk University-Seoul, Seoul 04620, Republic of Korea.

\*Correspondence: v.j.dhanasekaran@gmail.com; Tel.: +82-2-2260-8735

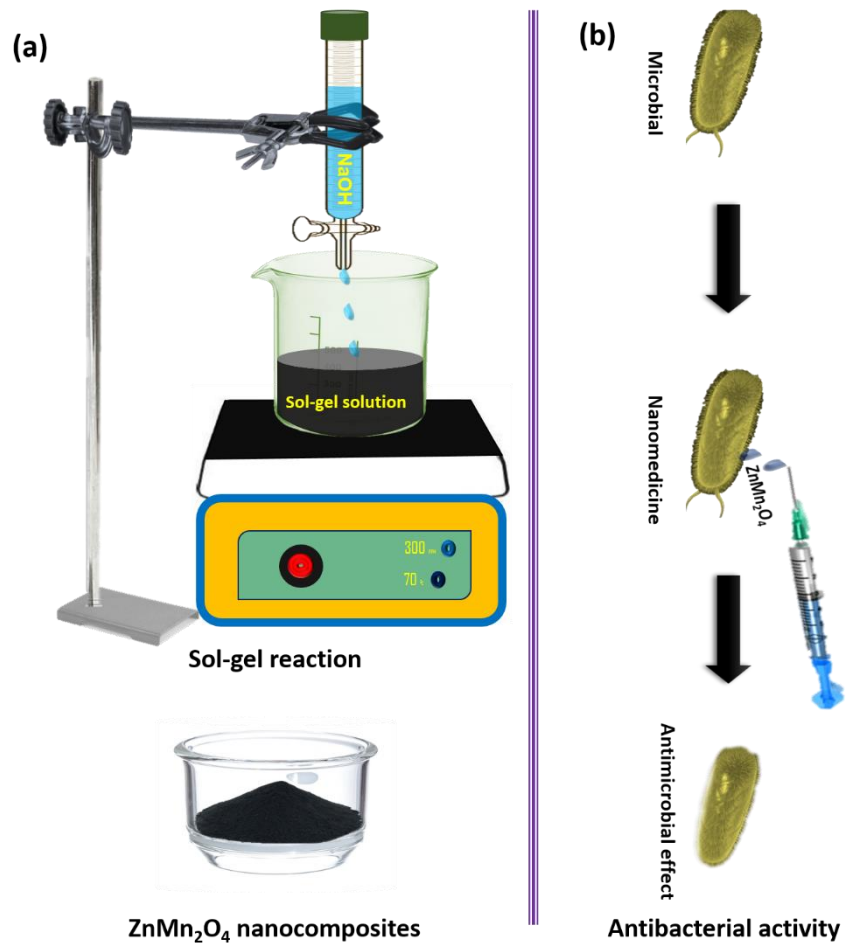

**Figure S1.** (a) Schematic showing the synthesis of ZnMn<sub>2</sub>O<sub>4</sub>-CS nanocomposites by sol-gel chemical reaction and their nanopowder; (b) typical mechanism of antibacterial activity of the nanocomposites.

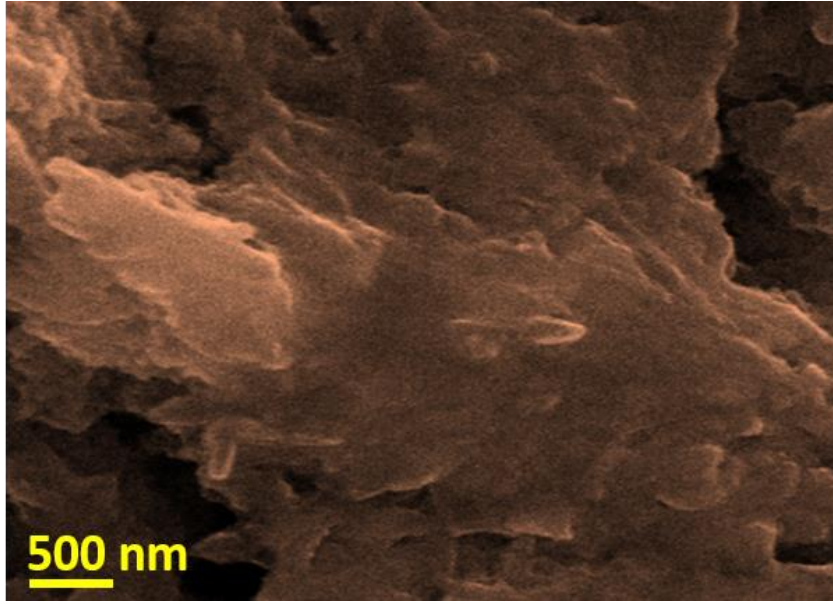

**Figure S2.** SEM micrograph of CS

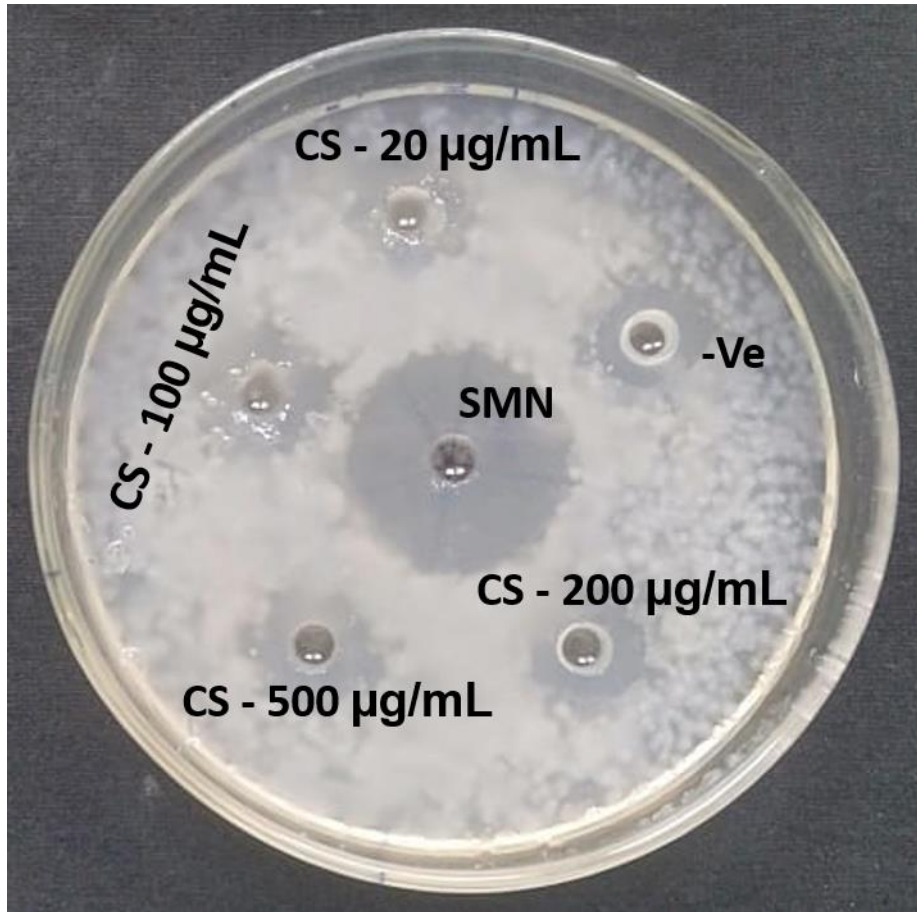

Figure S3. Antibacterial activity of Streptomycin and CS versus *B. subtilis*.

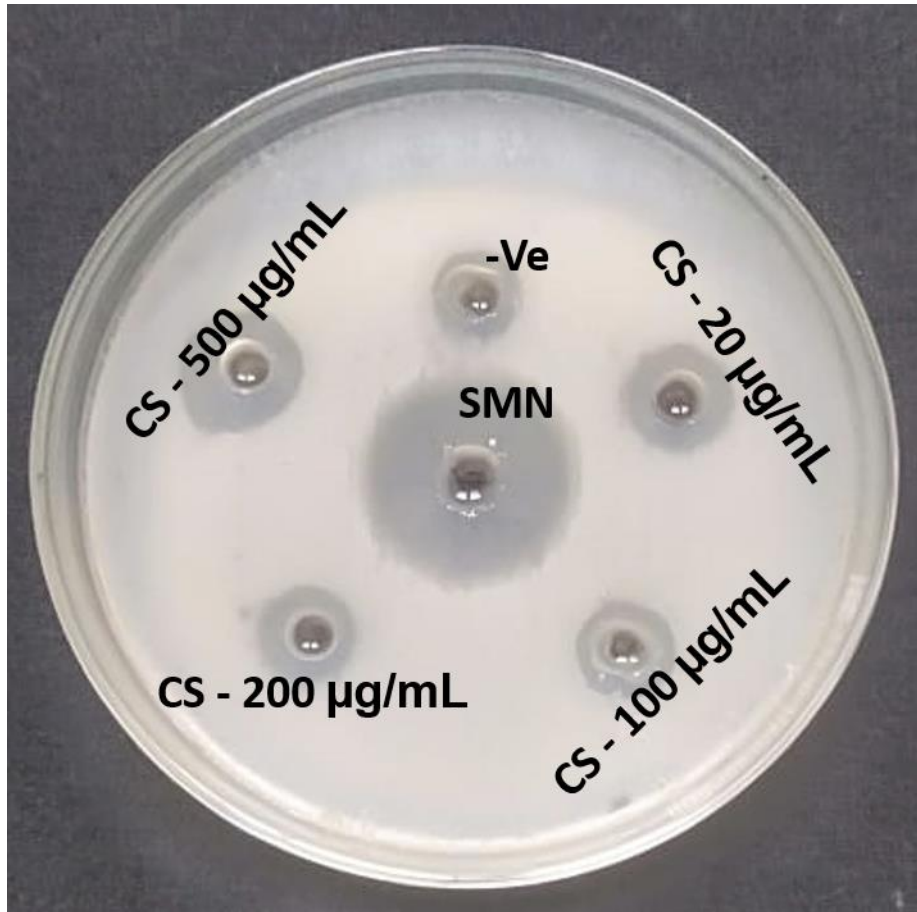

**Figure S4.** Antibacterial activity of Streptomycin and CS versus *E. coli*.

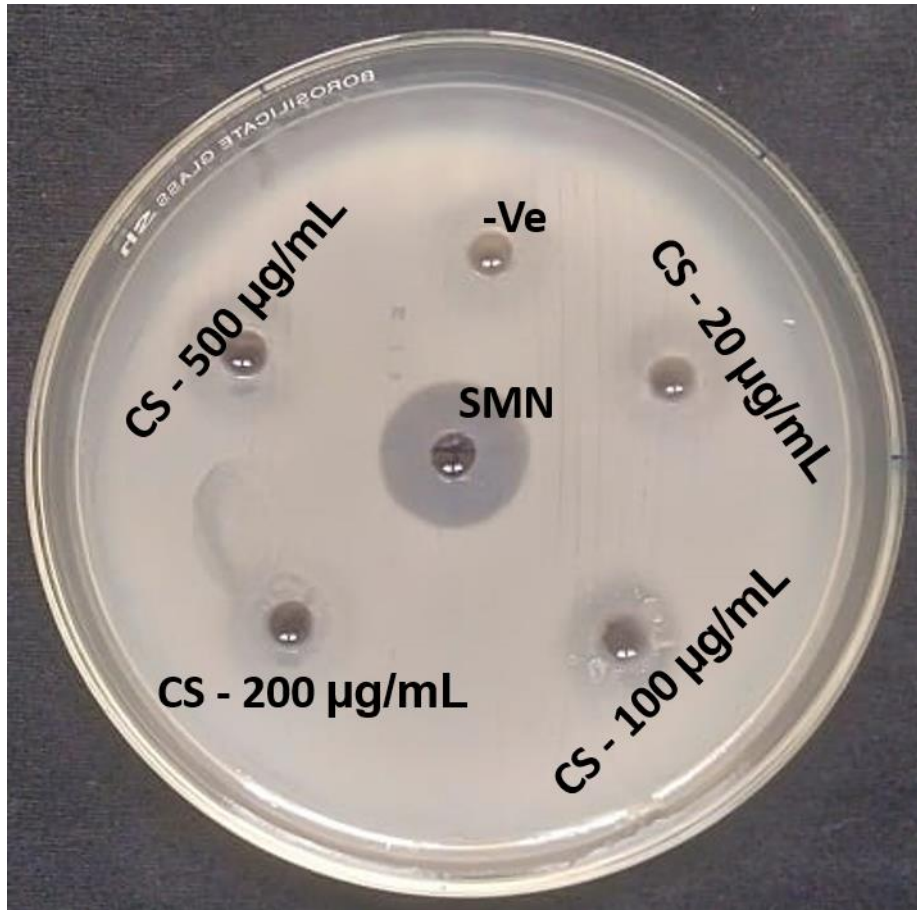

**Figure S5.** Antibacterial activity of Streptomycin and CS versus *S. typhi*.

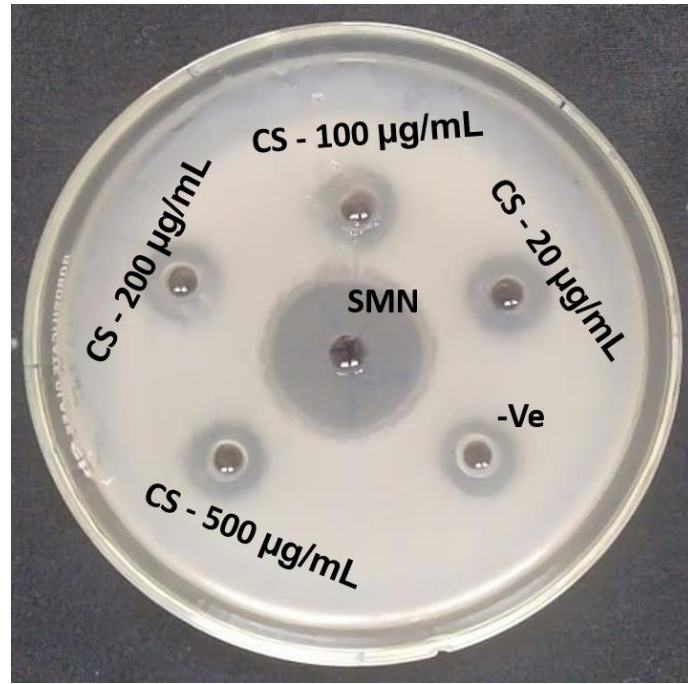

**Figure S6.** Antibacterial activity of Streptomycin and CS versus *P. aeruginosa*.
